# Supplementary material for: Exploring international differences in ovarian cancer treatment: a comparison of clinical practice guidelines and patterns of care
Source: PubMed Central journal article supplement — Int J Gynecol Cancer. 2020 Aug 11;30(11):1748–56. doi: 10.1136/ijgc-2020-001403 (PMC7656152; doi:10.1136/ijgc-2020-001403), 2020-08-11
Supplement: ijgc-2020-001403supp005.pdf [file ijgc-2020-001403supp005.pdf]

**Supplementary table.** Summary of distribution lists and response rates for each country

| Country     | Relevant societies/institutions used to distribute the questionnaire                                                                                                                               | Relevant clinicians (n) | Respondents (n) | Country-specific response rates (%) | Survey-specific response rates (%) |
|-------------|----------------------------------------------------------------------------------------------------------------------------------------------------------------------------------------------------|-------------------------|-----------------|-------------------------------------|------------------------------------|
| Norway      | Oslo University Hospital,<br>University Hospital of North Norway, Tromsø,<br>Stavanger University Hospital,<br>St. Olav's University Hospital, Trondheim,<br>Haukeland University Hospital, Bergen | 18                      | 18              | 100                                 | 15                                 |
| Australia   | Australia New Zealand Gynaecological Oncology Group (ANZGOG)                                                                                                                                       | 130*                    | 13              | 10                                  | 11                                 |
| Denmark     | Danish Gynaecological Cancer Group (DGCG)                                                                                                                                                          | 40                      | 16              | 40                                  | 13                                 |
| Canada      | The Society of Gynecological Oncology of Canada (GOC)                                                                                                                                              | 110*                    | 32              | 29                                  | 27                                 |
| UK          | British Gynaecological Cancer Society (BGCS)                                                                                                                                                       | 266                     | 30              | 11                                  | 25                                 |
| New Zealand | Australia New Zealand Gynaecological Oncology Group (ANZGOG)                                                                                                                                       | 23*                     | 7               | 30                                  | 6                                  |
| Ireland     | Irish Society of Gynaecological Oncology (ISGO),<br>Irish Society of Medical Oncology (ISMO)                                                                                                       | 22                      | 3               | 14                                  | 3                                  |

*\*Database confirmed*
